# Supplementary material for: Arabic validation of the Compulsive Internet Use Scale (CIUS)
Source: Springer Nature journal article supplement (doi:10.1186/1747-597x-6-32), 2011-11-29
Supplement: Additional file 1 [file 1747-597x-6-32-s1.pdf]

## COMPULSIVE INTERNET USE SCALE (CIUS)

CIUS [22]: Arab-language translation by Khazaal et al.

---

1. إلى أي درجة تجد صعوبة في التوقف عن استخدام الإنترنت، في حين كنت على الإنترنت؟

- أبدا
- نادرا
- أحيانا
- أكثر الأحيان
- غالبا

2. بأي كثرة تقرر استخدام الانترنت بالرغم من نيتك بالتوقف عن استخدامه

- أبدا
- نادرا
- أحيانا
- أكثر الأحيان
- غالبا

3. إلى أي مدى ينصحك اهلك والاصدقاء بالتخفيف من استخدام الانترنت؟

- أبدا
- نادرا
- أحيانا
- أكثر الأحيان
- غالبا

4. إلى أي مدى تفضل الجلوس وتصفح صفحات الانترنت بدل تضيئة الوقت مع الآخرين؟

- أبدا
- نادرا
- أحيانا
- أكثر الأحيان
- غالبا

5. إلى أي مدى تنقصك ساعات نوم بسبب الانترنت؟

- أبدا
- نادرا

- احيانا
- اكثر الاحيان
- غالبا

6. إلى أي مدى تفكر بالانترنت عندما تكون خارج المنزل؟

- ابدا
- نادرا
- احيانا
- اكثر الاحيان
- غالبا

7. إلى أي مدى تفرح لإستعمالك القادم للانترنت؟

- ابدا
- نادرا
- احيانا
- اكثر الاحيان
- غالبا

8.

إلى أي مدى تفكر في تخفيف استخدام الانترنت؟

- ابدا
- نادرا
- احيانا
- اكثر الاحيان
- غالبا

9.\* إلى أي مدى نجحت في تخفيف ساعات استخدام الانترنت؟

- ابدا
- نادرا
- احيانا
- اكثر الاحيان
- غالبا

10. إلى أي مدى تنجز أعمالك بسرعة للذهاب وتصفح الانترنت؟

- ابدا
- نادرا
- احيانا
- اكثر الاحيان
- غالبا

11. إلى أي مدى تهمل واجبتك اليومية من فروض مدرسية وعملية ومنزلية لأنك تفضل الجلوس على الانترنت؟

- ابدا
- نادرا
- احيانا

- اكثر الاحيان
- غالبا

12. إلى أي مدى تلجأ إلى الإنترنت لدى انخفاض معنوياتك؟

- ابدا
- نادرا
- احيانا
- اكثر الاحيان
- غالبا

13. إلى أي مدى تستخدم الإنترنت للهروب من الهموم او لمعالجة شعور سلبي؟

- ابدا
- نادرا
- احيانا
- اكثر الاحيان
- غالبا

14. إلى أي مدى تشعر أنك متوتر أو مكبوت لعدم قدرتك على استخدام الإنترنت؟

- ابدا
- نادرا
- احيانا
- اكثر الاحيان
- غالبا

\*(reversed item)
